# Supplementary material
Source: publisher figshare collection journal article supplement (https://tandf.figshare.com/articles/dataset/_/5057089)
Supplement: Supplementary file 1 [file 1]

# Supplement to “A model-free feature screening approach based on kernel density estimation”

Xiangjie Li <sup>†</sup>, Lei Wang<sup>†</sup>,Jingxiao Zhang<sup>†\*</sup>

<sup>†</sup>Center for Applied Statistics, School of Statistics, Renmin University of China, Beijing 100872, China.

May 31, 2017

The supplementary gives the proof of Proposition 2.1:

*Proof.* (1) If  $X_j$  is independent of  $Y$ , then  $X_j$  will be independent for any  $H$ , and so  $f(X|H = l) = f(X)$ , for any  $l \in \{1, \dots, S\}$ , thus  $\omega_j^S = 0$ . Now suppose  $\omega_j^S = 0$  for all choices of  $\mathcal{S}$ , say  $|g_l^o(x_j) - g_m^o(x_j)| = 0$  a.s. for any  $l, m \in \{1, \dots, S\}$ . We consider  $H = 1$  if  $Y \leq y$  and  $H = 2$  otherwise for any  $y$ . Because  $\omega_j^S = 0$  and  $X$  is independent of  $H$ ,  $f(X_j|Y \leq y) = f(X_j|Y > y)$  for all  $y$ , that is, if  $\Pr(Y \leq y) = 0$  or  $\Pr(Y > y) = 0$ , the result holds naturally and if  $\Pr(Y \leq y) > 0$  and  $\Pr(Y > y) > 0$ , then

$$\begin{aligned} \frac{f(X_j, Y \leq y)}{\Pr(Y \leq y)} &= \frac{f(X_j, Y > y)}{1 - \Pr(Y \leq y)} \\ \Leftrightarrow (f(X_j, Y \leq y) + f(X_j, Y > y)) \Pr(Y \leq y) &= f(X_j, Y \leq y) \\ \Leftrightarrow \Pr(Y \leq y) f(X_j) &= f(X_j, Y \leq y) \\ \Leftrightarrow \Pr(Y \leq y) f(X_j) &= f(X_j|Y \leq y) \Pr(Y \leq y) \\ \Leftrightarrow f(X_j) &= f(X_j|Y \leq y) \text{ for any } y. \end{aligned}$$

---

\*Corresponding author. Email: zhjxiaoruc@163.com

Consequently,  $X_j$  is independent of  $Y$ .

(2) Suppose  $\omega_j^S = 0$ , then  $X_j$  is independent of  $H$  according to the previous proposition. Therefore,  $\Pr(Y \leq a_1 | X_j) = \Pr(H = 1 | X_j) = \Pr(H = 1)$  is a constant unrelated to  $x_j$ , which contradicts with our assumption. As a result, we must have  $\omega_j^S$ .

(3) For the last conclusion, we define

$$\omega_j^* = \sup_{y_1, y_2} \int |g_{y_1}^o(x_j) - g_{y_2}^o(x_j)| dx_j, \quad (1)$$

where

$$\begin{aligned} g_{y_1}^o(x_j) &= \begin{cases} f(x_j | Y = y_1), & x_j \in \Omega_{y_1} \\ 0, & x_j \in \Omega_{y_2} \setminus \Omega_{y_1}. \end{cases} \\ g_{y_2}^o(x_j) &= \begin{cases} f(x_j | Y = y_2), & x_j \in \Omega_{y_2} \\ 0, & x_j \in \Omega_{y_1} \setminus \Omega_{y_2}. \end{cases} \end{aligned}$$

and

$$\omega_j^S = \max_{l, m} \int_{\Omega_l \cup \Omega_m} |g_l^o(x_j) - g_m^o(x_j)| dx_j, \quad (2)$$

where

$$\begin{aligned} g_l^o(x_j) &= \begin{cases} f(x_j | H = l), & x_j \in \Omega_l \\ 0, & x_j \in \Omega_m \setminus \Omega_l \end{cases} \\ g_m^o(x_j) &= \begin{cases} f(x_j | H = m), & x_j \in \Omega_m \\ 0, & x_j \in \Omega_l \setminus \Omega_m. \end{cases} \end{aligned}$$

It is noteworthy that  $g_{y_1}^o$  and  $g_{y_2}^o$  corresponds to the random variable  $Y$ , but  $g_l^o$  and  $g_m^o$  corresponds to the random variable  $H$ , however we abuse the notation a little by writing the  $g^o$  for both two cases. We can obtain  $\omega_j^* > 0$  in that  $X_j$  is not independent of  $Y$ ,  $\omega_j^* > 0$ . So we just need to prove  $\omega_j^S \rightarrow \omega_j^*$  as  $S \rightarrow \infty$ . By the definition  $\omega_j^*$ , for  $\forall \varepsilon > 0$ , there exists  $y_1^*, y_2^*$  such that

$$|\omega_j^* - \int |g_{y_1^*}^o(x_j) - g_{y_2^*}^o(x_j)| dx_j| < \varepsilon.$$

Because  $f(x_j|y)$  is continuous in  $y$  and is bounded by a fixed constant  $M$  and

$$\int |g_{y_1}^o(x_j) - g_{y_2}^o(x_j)| dx_j \leq \int [|g_{y_1}^o(x_j)| + |g_{y_2}^o(x_j)|] dx_j = 2.$$

there exists  $\delta > 0$  such that  $\int |g_y^o(x_j) - g_{y_1^*}^o(x_j)| dx_j$  for any  $|y - y_1^*| < \delta$ . Take  $\Delta = \Pr(|y - y_1^*| < \delta)$ , due to  $\max_{l=1, \dots, S} \Pr(H = l) \rightarrow 0$ , there exists  $S_0$  such that  $\Pr(H = l) \leq \frac{\Delta}{2}$  for  $S > S_0$ . In such cases, there exists  $[a_{l_1}, a_{l_1+1}) \subset (y_1^* - \delta, y_1^* + \delta)$ .

We can easily prove that

$$\int |g_{l_1}^o(x_j) - g_{y_1^*}^o(x_j)| dx_j \leq \varepsilon \quad (3)$$

Similarly, there exists  $l_2$  such that

$$\int |g_{l_2}^o(x_j) - g_{y_2^*}^o(x_j)| dx_j \leq \varepsilon \quad (4)$$

In addition,

$$\int |g_{l_1}^o(x_j) - g_{l_2}^o(x_j)| dx_j \leq \omega_j^S \leq \omega_j^*$$

Hence,

$$\begin{aligned} |\omega_j^* - \omega_j^S| &= \omega_j^* - \omega_j^S \\ &\leq \int |g_{y_1^*}^o(x_j) - g_{y_2^*}^o(x_j)| dx_j + \varepsilon - \int |g_{l_1}^o(x_j) - g_{l_2}^o(x_j)| dx_j \\ &\leq \int |g_{y_1^*}^o(x_j) - g_{y_2^*}^o(x_j) - g_{l_1}^o(x_j) + g_{l_2}^o(x_j)| dx_j + \varepsilon \\ &\leq \int [|g_{l_1}^o(x_j) - g_{y_1^*}^o(x_j)| + |g_{l_2}^o(x_j) - g_{y_2^*}^o(x_j)|] dx_j + \varepsilon \\ &= \sum_{i=1,2} \int |g_{l_i}^o(x_j) - g_{y_i^*}^o(x_j)| dx_j + \varepsilon \\ &\leq 3\varepsilon. \end{aligned}$$

Due to  $\varepsilon$  is arbitrary, the conclusion follows.  $\square$
